# Supplementary material for: Алгоритм выявления латентных технологических дефектов печатных плат методом оптического контроля
Source: Royal Society of Chemistry journal article supplement (doi:10.1039/c6cp00264a), 2013-01-01
Supplement: c6cp00264a1.pdf [file c6cp00264a1.pdf]

# Development of high efficiency 100% aqueous cobalt electrolyte dye-sensitised solar cells

-- Supporting Information --

*Hanna Ellis,<sup>a</sup> Roger Jiang,<sup>a</sup> Sofie Ye,<sup>a</sup> Anders Hagfeldt,<sup>a,b,c</sup> and Gerrit Boschloo<sup>a</sup>*

a) Physical Chemistry, Center of Molecular Devices, Department of Chemistry - Ångström Laboratory, Uppsala University, SE-75120 Uppsala, Sweden.

b) Laboratory of Photomolecular Science, Institute of Chemical Sciences and Engineering, School of Basic Sciences, École Polytechnique Fédérale de Lausanne (EPFL), CH-1015 Lausanne, Switzerland.

c) Center of Excellence for Advanced Materials Research, King Abdulaziz University, Jeddah 215889, Saudi Arabia.

## Table of Content

## Page

|      |                                                                                                                     |    |
|------|---------------------------------------------------------------------------------------------------------------------|----|
| SI-1 | Electrochemical and optical characterisation                                                                        |    |
|      | Fig. S1 Molar extinction coefficients of redox species                                                              | 3  |
|      | Fig. S2 Cyclic voltammogram of $[\text{Co}(\text{bpy})_3]\text{Cl}_2$ in water                                      | 3  |
|      | Fig. S3 Cyclic voltammogram of $[\text{Co}(\text{phen})_3]\text{Cl}_2$ in water                                     | 3  |
|      | Fig. S4 Cyclic voltammogram of D51 in water                                                                         | 4  |
|      | Fig. S5 Cyclic voltammogram of LEG4 in water                                                                        | 4  |
|      | Fig. S6 Determining diffusion coefficient of $[\text{Fe}(\text{CN})_6]^{3+}$ in water                               | 4  |
|      | Fig. S7 Determining diffusion coefficient of $[\text{Co}(\text{bpy})_3]^{2+}$ in water                              | 5  |
|      | Fig. S8 Determining diffusion coefficient of $[\text{Co}(\text{phen})_3]^{2+}$ in water                             | 5  |
|      | Fig. S9 Contact angles                                                                                              | 6  |
| SI-2 | DSC characterisation                                                                                                |    |
|      | Fig. S10 J-V curves at 1 sun                                                                                        | 7  |
|      | Fig. S11 J-V curves in dark                                                                                         | 7  |
| SI-3 | Kinetics and mass transport                                                                                         |    |
|      | Fig. S12 TAS: LEG4 with and without $[\text{Co}(\text{bpy})_3](\text{PF}_6)_2$ in acetonitrile                      | 8  |
|      | Fig. S13 TAS: D51 with and without $[\text{Co}(\text{phen})_3]\text{Cl}_2$ in water                                 | 8  |
|      | Fig. S14 TAS: LEG4 with and without $[\text{Co}(\text{phen})_3]\text{Cl}_2$ in water                                | 8  |
|      | Fig. S15 PT: $J_{\text{peak}}$ versus bias light, different 3+ conc                                                 | 9  |
|      | Fig. S16 PT: $J_{\text{peak}}$ versus bias light, different spacing CE and WE                                       | 9  |
| SI-4 | Stability measurements                                                                                              |    |
|      | Fig. S17 J-V curves during MPP measurements                                                                         | 10 |
|      | Fig. S18 Stability J-V                                                                                              | 10 |
|      | Fig. S19 Stability: $V_{\text{OC}}$                                                                                 | 10 |
|      | Fig. S20 Stability: $J_{\text{SC}}$                                                                                 | 10 |
|      | Fig. S21 Stability: FF                                                                                              | 11 |
| SI-5 | Increasing the $V_{\text{OC}}$                                                                                      |    |
|      | Fig. S22 Cyclic voltammogram of $[\text{Co}(\text{bpy-pz})_3]\text{Cl}_2$ in water                                  | 12 |
|      | Fig. S23 Determining diffusion coefficient of $[\text{Co}(\text{bpy-pz})_3]^{2+}$ in water                          | 12 |
|      | Fig. S24 J-V curve at 1 sun for $\text{Co}(\text{bpy-pz})_3$ electrolyte                                            | 13 |
|      | Fig. S25 PT: $J_{\text{eq}}$ versus bias light, $\text{Co}(\text{phen})_3$ compared to $\text{Co}(\text{bpy-pz})_3$ | 13 |

## SI-1 Electrochemical and optical characterisation

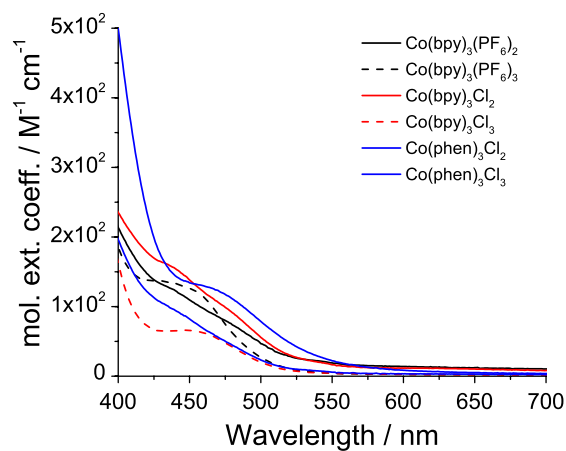

Fig. S1 Molar extinction coefficients of the water soluble redox couples compared to  $[\text{Co}(\text{bpy})_3](\text{PF}_6)_2$  and  $[\text{Co}(\text{bpy})_3](\text{PF}_6)_3$  in acetonitrile. 1 mM of each redox species was dissolved in water (for the water soluble redox couples) or in acetonitrile.

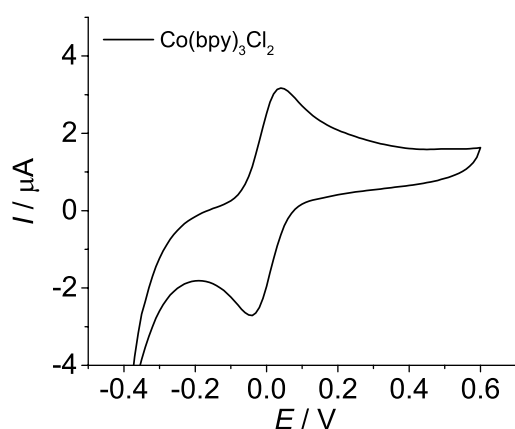

Fig. S2 Cyclic Voltammogram of  $[\text{Co}(\text{bpy})_3]\text{Cl}_2$  in water. Electrolyte: 1 mM  $[\text{Co}(\text{bpy})_3]\text{Cl}_2$ , 1 M KCl in water, WE: glassy carbon, CE: graphite rod, Ref: Ag|AgCl.

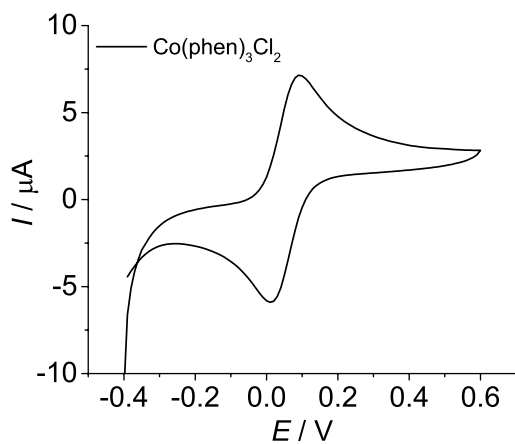

Fig. S3 Cyclic Voltammogram of  $[\text{Co}(\text{phen})_3]\text{Cl}_2$  in water. Electrolyte: 1 mM  $[\text{Co}(\text{phen})_3]\text{Cl}_2$ , 1 M KCl in water, WE: glassy carbon, CE: graphite rod, Ref: Ag|AgCl.

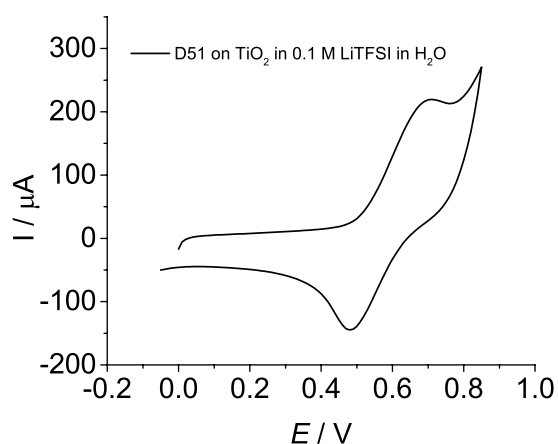

Fig. S4 Cyclic Voltammogram of D51 sensitised on a  $\text{TiO}_2$  film measured in water. Electrolyte: 0.1 M LiTFSI, 0.05 M Triton in water, WE: dye-sensitised  $\text{TiO}_2$  film on FTO glass, CE: graphite rod, Ref: Ag/AgCl.

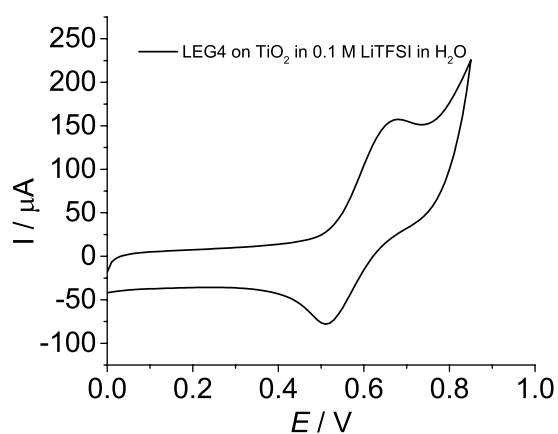

Fig. S5 Cyclic Voltammogram of LEG4 sensitised on a  $\text{TiO}_2$  film measured in water. Electrolyte: 0.1 M LiTFSI, 0.05 M Triton in water, WE: dye-sensitised  $\text{TiO}_2$  film on FTO glass, CE: graphite rod, Ref: Ag/AgCl.

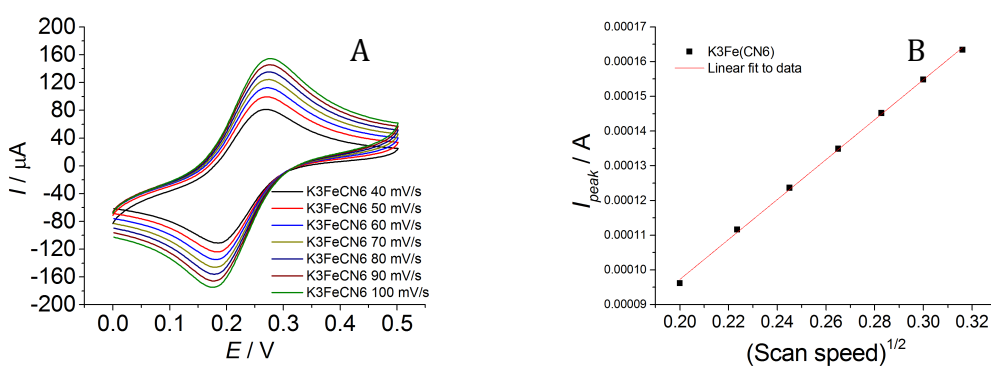

Fig. S6 Determining the diffusion coefficient of  $\text{K}_3[\text{Fe}(\text{CN})_6]$  in water. A: Cyclic voltammograms were measured at different scanning speeds. Electrolyte: 10 mM  $\text{K}_3[\text{Fe}(\text{CN})_6]$ , 0.5 M KCl in water, WE: glassy carbon, CE: carbon rod, Ref: Ag/AgCl. B: The peak currents plotted versus the square root of the scan speeds.

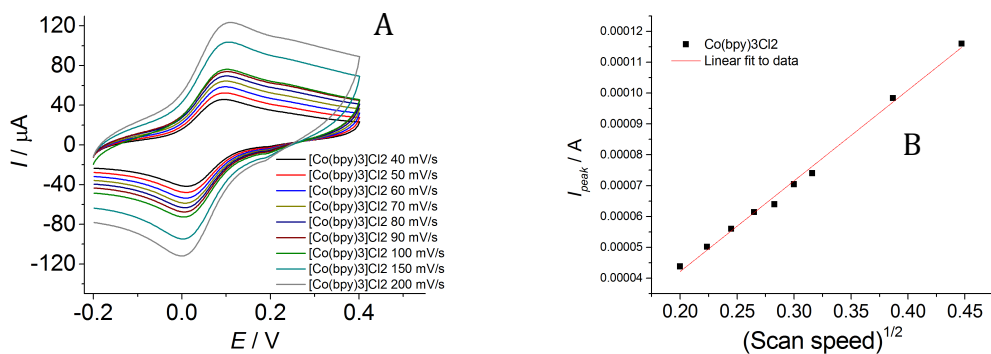

Fig. S7 Determining the diffusion coefficient of  $[\text{Co}(\text{bpy})_3]\text{Cl}_2$  in water in water. A: Cyclic voltammograms were measured at different scanning speeds. Electrolyte: 5 mM  $[\text{Co}(\text{bpy})_3]\text{Cl}_2$ , 0.5 M KCl in water, WE: glassy carbon, CE: carbon rod, Ref: Ag|AgCl. B: The peak currents plotted versus the square root of the scan speeds.

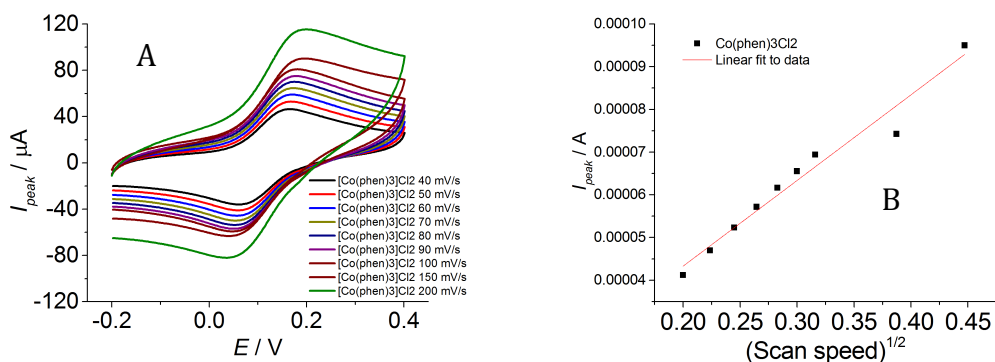

Fig. S8 Determining the diffusion coefficient of  $[\text{Co}(\text{phen})_3]\text{Cl}_2$  in water in water. A: Cyclic voltammograms were measured at different scanning speeds. Electrolyte: 5 mM  $[\text{Co}(\text{phen})_3]\text{Cl}_2$ , 0.5 M KCl in water, WE: glassy carbon, CE: carbon rod, Ref: Ag|AgCl. B: The peak currents plotted versus the square root of the scan speeds.

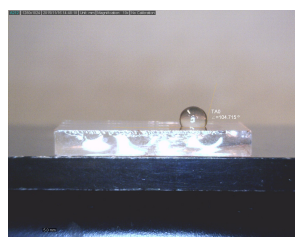

LEG4 + water

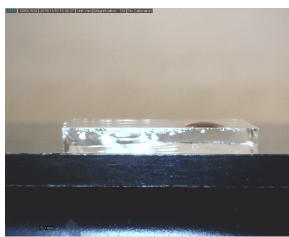

D51 + water

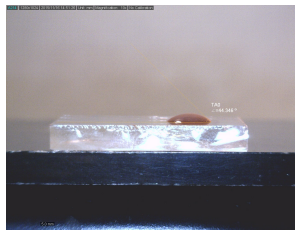

LEG4 + MBI

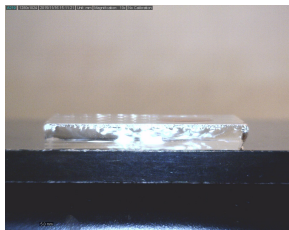

D51 + MBI

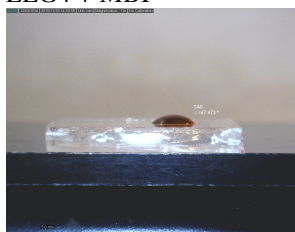

LEG4 + phen

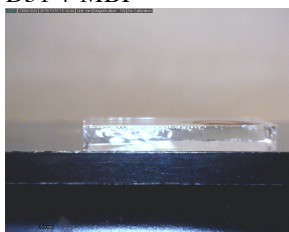

D51 + phen

Fig. S9 Contact angles measured of deionised water (top), 0.8 M MBI in deionised water (middle) and 0.13 M  $[\text{Co}(\text{phen})_3]\text{Cl}_2$  and 0.8 M MBI in deionised water (bottom) on LEG4 (left column) or D51 (right column) sensitised  $\text{TiO}_2$  surfaces.

## SI-2 DSC characterisation

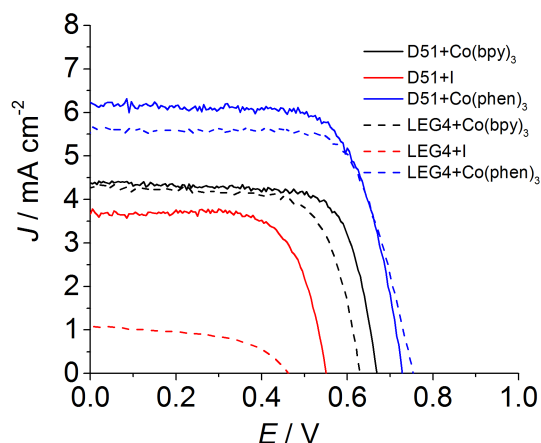

Fig. S10 J-V curves measured at 1 sun of solar cells assembled with the organic dyes D51 or LEG4 in combination with  $\text{Co(bpy)}_3$ ,  $\text{Co(phen)}_3$  or  $\text{I/I}_3^-$  based electrolytes. The electrolytes were the following:  $\text{Co(bpy)}_3$  (0.13 M  $[\text{Co(bpy)}_3]\text{Cl}_2$ , 0.04 M  $[\text{Co(bpy)}_3]\text{Cl}_3$ , 0.8 M MBI in water),  $\text{Co(phen)}_3$  (0.13 M  $[\text{Co(phen)}_3]\text{Cl}_2$ , 0.04 M  $[\text{Co(phen)}_3]\text{Cl}_3$ , 0.8 M MBI in water) and  $\text{I/I}_3^-$  (4 M KI, 20 mM  $\text{I}_2$  in water).

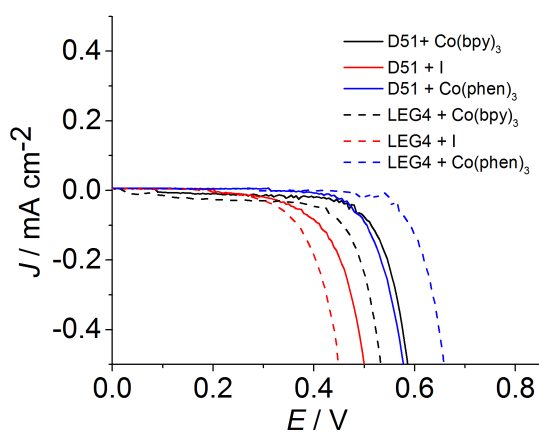

Fig. S11 J-V curves measured at in dark of solar cells assembled with the organic dyes D51 or LEG4 in combination with  $\text{Co(bpy)}_3$ ,  $\text{Co(phen)}_3$  or  $\text{I/I}_3^-$  based electrolytes. The electrolytes were the following  $\text{Co(bpy)}_3$  (0.13 M  $[\text{Co(bpy)}_3]\text{Cl}_2$ , 0.04 M  $[\text{Co(bpy)}_3]\text{Cl}_3$ , 0.8 M MBI in water),  $\text{Co(phen)}_3$  (0.13 M  $[\text{Co(phen)}_3]\text{Cl}_2$ , 0.04 M  $[\text{Co(phen)}_3]\text{Cl}_3$ , 0.8 M MBI in water) and  $\text{I/I}_3^-$  (4 M KI, 20 mM  $\text{I}_2$  in water).

### SI-3 Kinetics and mass transport

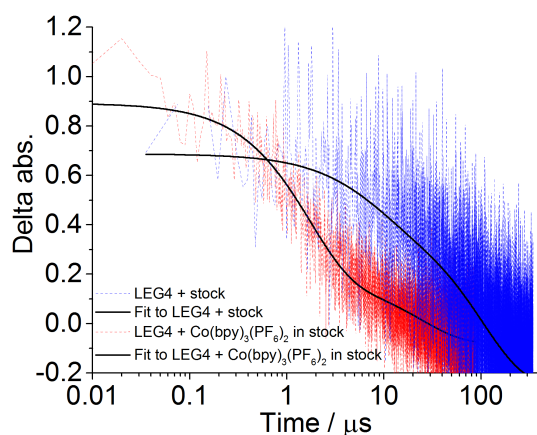

Fig. S12 Transient absorption measurements. Measurements are done on LEG4 sensitised  $\text{TiO}_2$  films in contact with stock solution (0.2 M TBP and 0.1 M  $\text{LiClO}_4$  in acetonitrile) shown as blue trace and redox species in stock solution (0.22 M  $[\text{Co}(\text{bpy})_3]\text{Cl}_2$ , 0.2 M TBP, 0.1 M  $\text{LiClO}_4$  in acetonitrile) as red trace. Fitting to data is shown as black line.

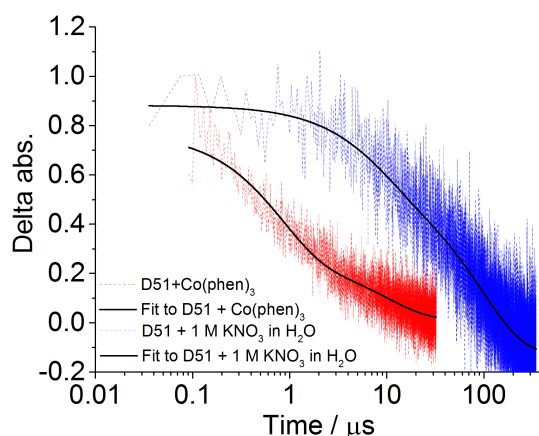

Fig. S13 Transient absorption measurements. Measurements are done on D51-sensitised  $\text{TiO}_2$  films in contact with 1 M  $\text{KNO}_3$  in water, shown as blue trace and 0.13 M  $[\text{Co}(\text{phen})_3]\text{Cl}_2$  in water, shown as red trace. Fitting to data is shown as black line.

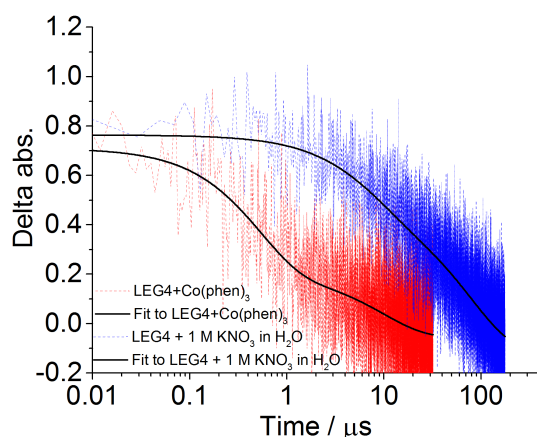

Fig. S14 Transient absorption measurements. Measurements are done on LEG4-sensitised  $\text{TiO}_2$  films in contact with 1 M  $\text{KNO}_3$  in water, shown as blue trace and 0.13 M  $[\text{Co}(\text{phen})_3]\text{Cl}_2$  in water, shown as red trace. Fitting to data is shown as black line.



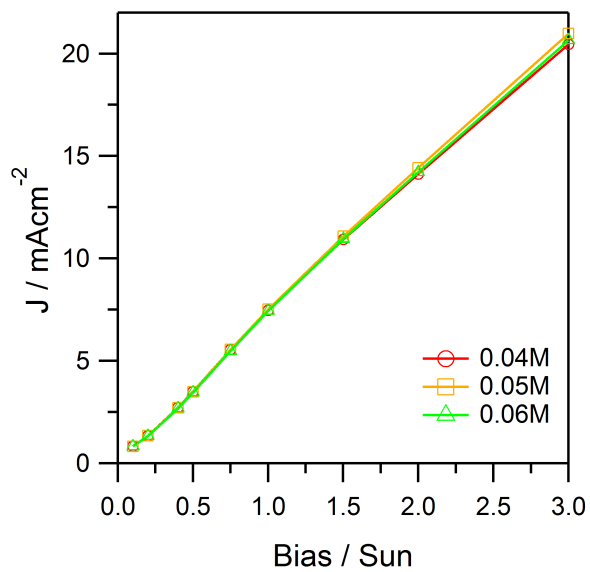

Fig. S15 Photocurrent transient measurements with extracted  $J_{peak}$  plotted versus biased light. Red = 0.04 M, yellow = 0.05 M, green = 0.06 M  $[\text{Co}(\text{phen})_3]\text{Cl}_3$ .

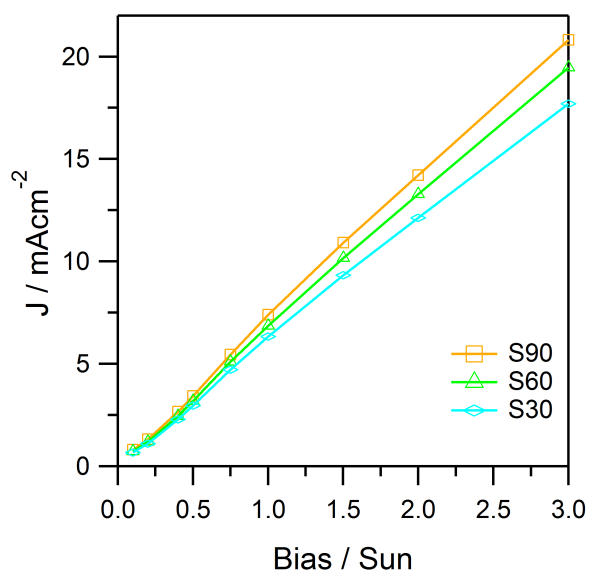

Fig. S16 Photocurrent transient measurements with extracted  $J_{peak}$  plotted versus biased light. yellow = S90 = 15  $\mu\text{m}$ , green = S60 = 18  $\mu\text{m}$  and blue = S30 = 20  $\mu\text{m}$  thickness of spacer between working electrode and counter electrode.

#### SI-4 Stability measurements

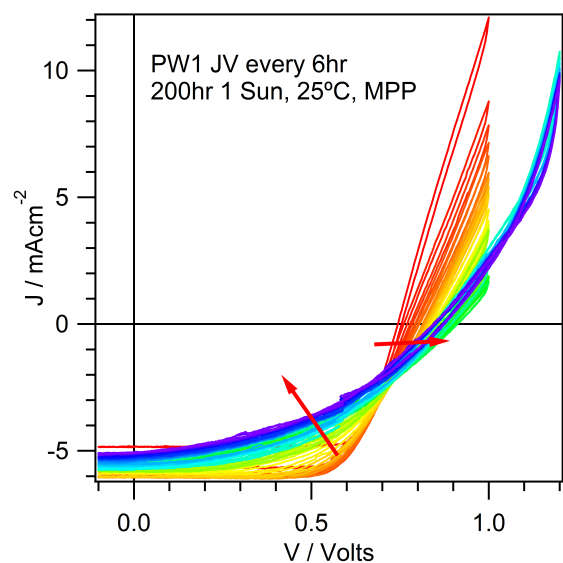

Fig. S17 J-V curves measured every 6 hour, at 1 sun, at MPP, of solar cells assembled with the organic dye D51 and 0.13 M  $[\text{Co}(\text{phen})_3]\text{Cl}_2$ , 0.04 M  $[\text{Co}(\text{phen})_3]\text{Cl}_3$ , 0.8 M MBI in water as electrolyte.

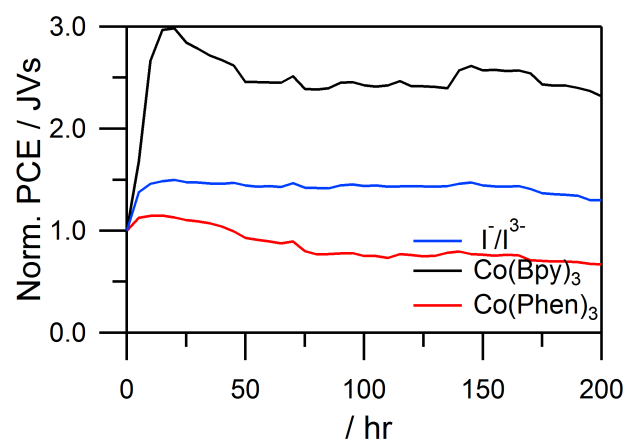

Fig. S18 Evolution of the PCE obtained by J-V measurements every 5 hours, during 200 hours, 1 sun illumination at MPP.

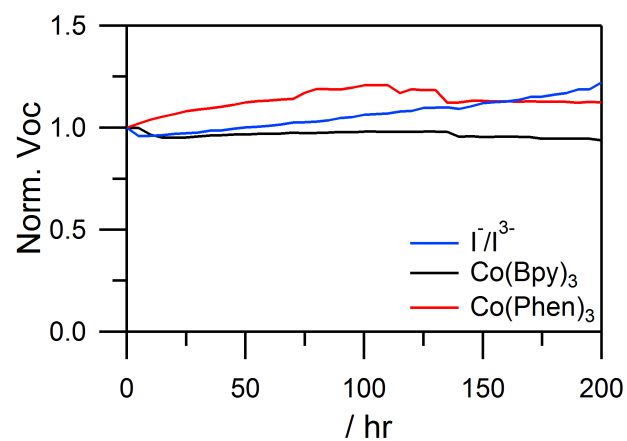

Fig. S19 Evolution of the  $V_{oc}$  during 200 hours, 1 sun illumination at MPP.

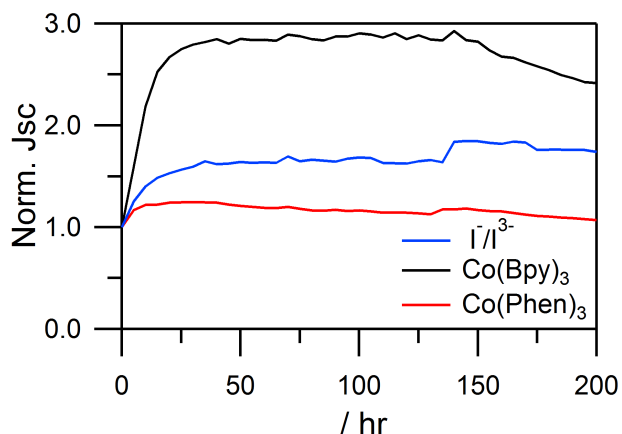

Fig. S20 Evolution of the  $J_{SC}$  during 200 hours, 1 sun illumination at MPP.

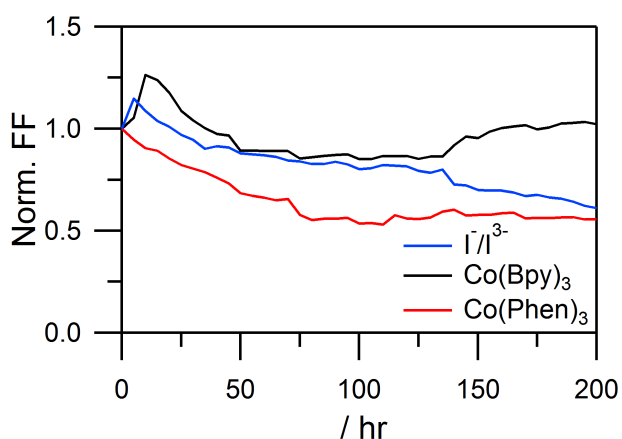

Fig. S21 Evolution of the FF during 200 hours, 1 sun illumination at MPP.

After approximately 120 hours, some zig-zagging can be observed in the PCE trends (calculated from MPP tracking) seen in Figure 8. However, this trend is not observed for the PCE trends calculated from J-Vs (Figure S18). This was due to a change in the J-V scanning range, which was implemented at approximately 120 hours due to the increasing  $V_{OC}$ , the forward scan bias range increased from 1 V to 1.2 V. This led to some insignificant transient hysteresis when MPP tracking after each J-V, observable as zig-zags; the overall stability trend was unchanged.

## SI-5 Increasing the $V_{oc}$

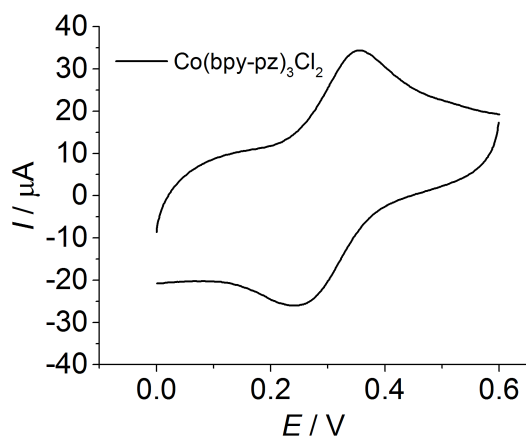

Fig. S22 Cyclic Voltammogram of  $[\text{Co}(\text{bpy-pz})_3]\text{Cl}_2$  in water. Electrolyte: 1 mM  $[\text{Co}(\text{bpy-pz})_3]\text{Cl}_2$ , 1 M KCl in water, WE: glassy carbon, CE: graphite rod, Ref: Ag/AgCl.

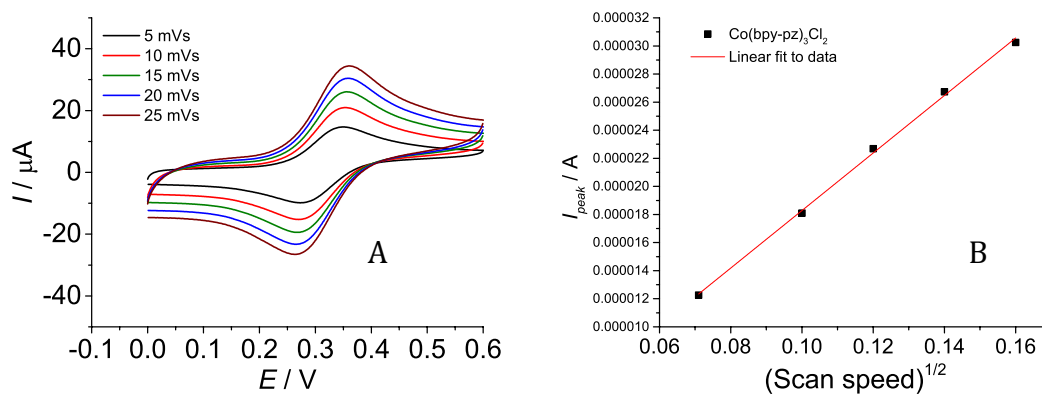

Fig. S23 Determining the diffusion coefficient of  $[\text{Co}(\text{bpy})_3]\text{Cl}_2$  in water. A: Cyclic voltammograms were measured at different scanning speeds. Electrolyte: 5 mM  $[\text{Co}(\text{bpy})_3]\text{Cl}_2$ , 0.5 M KCl in water, WE: glassy carbon, CE: carbon rod, Ref: Ag/AgCl. B: The peak currents plotted versus the square root of the scan speeds.

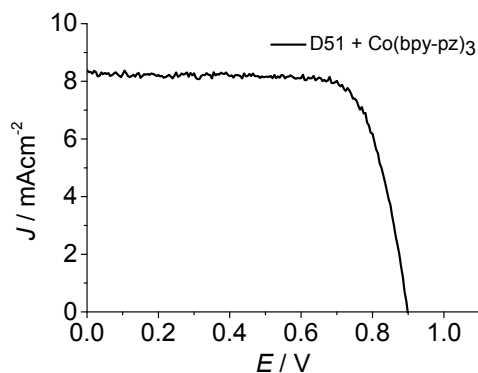

Fig. S24 JV curve measured at 1 sun of solar cells assembled with the organic dyes D51 in combination with  $\text{Co(bpy-pz)}_3$  electrolyte. The electrolyte consisted of: 0.13 M  $[\text{Co(bpy-pz)}_3]\text{Cl}_2$ , 0.06 M  $[\text{Co(bpy-pz)}_3]\text{Cl}_3$  and 0.8 M MBI in water.

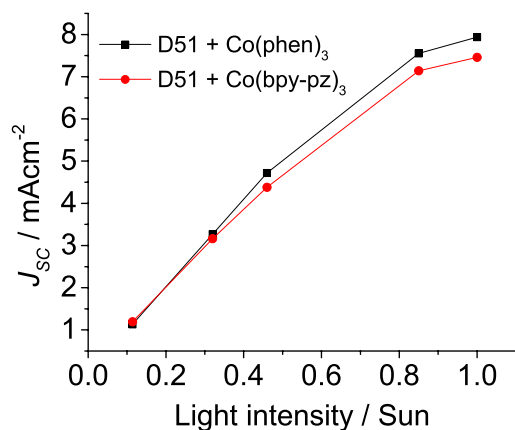

Fig. S25 Photocurrent linearity,  $J_{sc}$  plotted versus biased light. The  $\text{Co(phen)}_3$  and  $\text{Co(bpy-pz)}_3$  electrolytes have the same weak mass transport limitation. Measurements performed on solar cells with D51 dye and  $\text{Co(phen)}_3$  and  $\text{Co(bpy-pz)}_3$  electrolytes (0.13 M  $[\text{Co(phen/bpy-pz)}_3]\text{Cl}_2$ , 0.06 M  $[\text{Co(phen/bpy-pz)}_3]\text{Cl}_3$  and 0.8 M MBI in water).
